# Supplementary material
Source: PubMed Central journal article supplement (PMC2764907)
Supplement: 0810943106_0810943106SI.pdf [file 0810943106_0810943106SI.pdf]

# Supporting Information

Conway and Tsaob 10.1073/pnas.0810943106

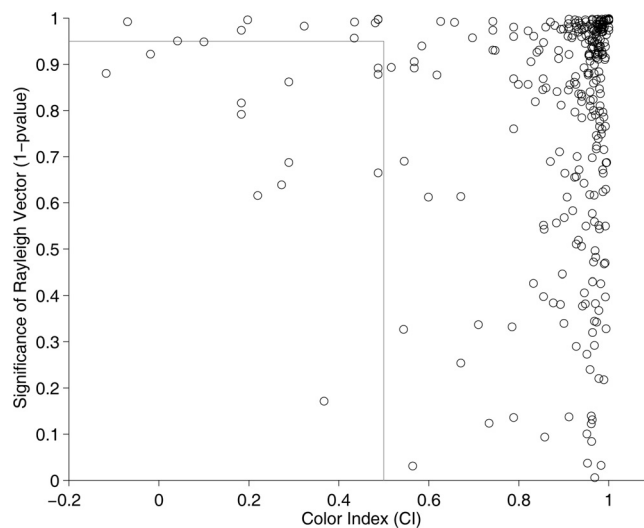

**Fig. S1.** Quantification of the degree of color tuning of the population of glob cells. Cells with  $CI \geq 0.5$  or a Rayleigh vector length  $\geq 0.95$  were deemed color-tuned.

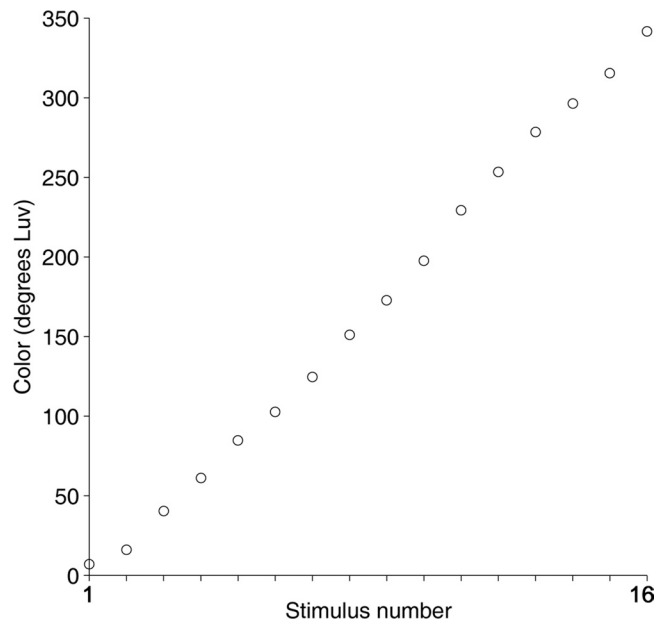

Fig. S2. The stimuli of the CIELUV stimulus subset (used to assess color tuning) uniformly sample the CIELUV color space.

**Table S1. CIE x and y values and the CIELUV color angles of all of the stimuli**

Color series 1; lower luminance than background Color series 2; equiluminant with background Color series 3; higher luminance than background

| CIELUV color angle | CIE x | CIE y | Luminance (cd/m <sup>2</sup> ) | Stimulus number (Fig. S2) | CIELUV color angle | CIE x        | CIE y        | Luminance (cd/m <sup>2</sup> ) | CIELUV color angle | CIE x | CIE y | Luminance (cd/m <sup>2</sup> ) |
|--------------------|-------|-------|--------------------------------|---------------------------|--------------------|--------------|--------------|--------------------------------|--------------------|-------|-------|--------------------------------|
| 15.54              | 0.616 | 0.354 | 0.6                            | <b>1</b>                  | <b>6.92</b>        | <b>0.542</b> | <b>0.311</b> | <b>3.09</b>                    | 8.43               | 0.555 | 0.317 | 7.84                           |
| 19.58              | 0.61  | 0.375 | 0.63                           |                           | 6.76               | 0.544        | 0.31         | 3.09                           | 12.22              | 0.584 | 0.335 | 7.85                           |
| 16.98              | 0.586 | 0.359 | 0.67                           |                           | 15.72              | 0.616        | 0.355        | 3.11                           | 15.55              | 0.615 | 0.354 | 7.8                            |
| 26.61              | 0.559 | 0.396 | 0.68                           | <b>2</b>                  | <b>16.17</b>       | <b>0.61</b>  | <b>0.357</b> | <b>3.04</b>                    | 15.78              | 0.611 | 0.355 | 7.73                           |
| 40.71              | 0.528 | 0.434 | 0.58                           |                           | 18.84              | 0.594        | 0.369        | 3.05                           | 18.61              | 0.595 | 0.368 | 7.73                           |
| 62.5               | 0.487 | 0.473 | 0.61                           |                           | 26.47              | 0.561        | 0.396        | 3.06                           | 26.29              | 0.56  | 0.395 | 7.77                           |
| 81.77              | 0.44  | 0.481 | 0.62                           | <b>3</b>                  | <b>40.31</b>       | <b>0.515</b> | <b>0.426</b> | <b>3.14</b>                    | 40.13              | 0.518 | 0.427 | 7.77                           |
| 108.11             | 0.391 | 0.51  | 0.64                           | <b>4</b>                  | <b>61.11</b>       | <b>0.475</b> | <b>0.458</b> | <b>2.96</b>                    | 61.47              | 0.475 | 0.459 | 7.95                           |
| 127.53             | 0.337 | 0.528 | 0.58                           | <b>5</b>                  | <b>84.83</b>       | <b>0.438</b> | <b>0.489</b> | <b>3.07</b>                    | 85.5               | 0.437 | 0.49  | 7.76                           |
| 120.18             | 0.363 | 0.544 | 0.58                           | <b>6</b>                  | <b>102.73</b>      | <b>0.404</b> | <b>0.508</b> | <b>3.09</b>                    | 102.7              | 0.406 | 0.513 | 7.69                           |
| 136.11             | 0.292 | 0.607 | 0.6                            |                           | 117.93             | 0.37         | 0.541        | 3.08                           | 113.83             | 0.381 | 0.532 | 7.86                           |
| 134.9              | 0.299 | 0.606 | 0.64                           | <b>7</b>                  | <b>124.68</b>      | <b>0.348</b> | <b>0.555</b> | <b>3.01</b>                    | 122.74             | 0.355 | 0.553 | 7.85                           |
| <b>133.45</b>      | 0.31  | 0.578 | 0.64                           |                           | 130.5              | 0.324        | 0.576        | 3.04                           | 127.79             | 0.336 | 0.565 | 7.79                           |
| 130.41             | 0.325 | 0.564 | 0.64                           |                           | 133.5              | 0.309        | 0.585        | 3.06                           | 132.52             | 0.314 | 0.583 | 7.69                           |
| 134.92             | 0.299 | 0.605 | 0.64                           |                           | 134.48             | 0.303        | 0.593        | 3                              | 135.34             | 0.298 | 0.596 | 7.79                           |
| 136.65             | 0.288 | 0.612 | 0.62                           |                           | 136.34             | 0.292        | 0.599        | 3.05                           | 135.5              | 0.297 | 0.597 | 7.74                           |
| 219.8              | 0.189 | 0.26  | 0.6                            |                           | 135.98             | 0.295        | 0.593        | 3.05                           | 136.11             | 0.293 | 0.601 | 7.84                           |
| 226.27             | 0.206 | 0.254 | 0.6                            |                           | 136.63             | 0.29         | 0.601        | 3.04                           | 136.52             | 0.291 | 0.599 | 7.85                           |
| 225.83             | 0.206 | 0.255 | 0.6                            |                           | 151.08             | 0.257        | 0.477        | 3.01                           | 141.92             | 0.274 | 0.546 | 7.75                           |
| 213.62             | 0.2   | 0.28  | 0.67                           |                           | 150.56             | 0.26         | 0.476        | 3.03                           | 141.73             | 0.275 | 0.546 | 7.74                           |
| 222.99             | 0.207 | 0.262 | 0.6                            | <b>8</b>                  | <b>151.35</b>      | <b>0.254</b> | <b>0.48</b>  | <b>3.03</b>                    | 148.24             | 0.261 | 0.496 | 7.86                           |
| 222.33             | 0.197 | 0.258 | 0.6                            |                           | 150.96             | 0.257        | 0.478        | 3.03                           | 157.03             | 0.248 | 0.447 | 7.79                           |
| 215.97             | 0.208 | 0.278 | 0.67                           | <b>9</b>                  | <b>172.9</b>       | <b>0.232</b> | <b>0.387</b> | <b>3.04</b>                    | 166.24             | 0.237 | 0.41  | 7.72                           |
| 225.22             | 0.207 | 0.257 | 0.6                            | <b>10</b>                 | <b>197.66</b>      | <b>0.216</b> | <b>0.321</b> | <b>3.06</b>                    | 187.12             | 0.222 | 0.347 | 7.8                            |
| 242.76             | 0.172 | 0.182 | 0.7                            |                           | 215.89             | 0.203        | 0.276        | 3.09                           | 211.69             | 0.204 | 0.286 | 7.85                           |
| 249.69             | 0.176 | 0.161 | 0.61                           | <b>11</b>                 | <b>229.3</b>       | <b>0.191</b> | <b>0.237</b> | <b>3.03</b>                    | 222.93             | 0.196 | 0.256 | 7.77                           |
| 255.93             | 0.158 | 0.113 | 0.61                           |                           | 241.9              | 0.182        | 0.194        | 3.18                           | 236.54             | 0.184 | 0.212 | 7.75                           |
| 259.55             | 0.152 | 0.086 | 0.61                           |                           | 248.54             | 0.17         | 0.159        | 3.07                           | 246.7              | 0.173 | 0.169 | 7.88                           |
| 260.67             | 0.148 | 0.074 | 0.5                            | <b>12</b>                 | <b>253.5</b>       | <b>0.16</b>  | <b>0.127</b> | <b>3</b>                       | 253.13             | 0.162 | 0.131 | 7.74                           |
| 260.97             | 0.145 | 0.068 | 0.59                           |                           | 257.75             | 0.152        | 0.096        | 3.11                           | 257.48             | 0.154 | 0.1   | 7.8                            |
| <b>260.4</b>       | 0.141 | 0.066 | 0.57                           |                           | 259.94             | 0.147        | 0.077        | 3.11                           | 260                | 0.148 | 0.078 | 7.81                           |
| 261.29             | 0.145 | 0.066 | 0.7                            |                           | 260.91             | 0.144        | 0.067        | 3                              | 261.29             | 0.145 | 0.066 | 7.75                           |
| 261.74             | 0.147 | 0.066 | 0.7                            |                           | 261.39             | 0.144        | 0.064        | 3.06                           | 261.39             | 0.144 | 0.064 | 7.74                           |
| 262.38             | 0.154 | 0.072 | 0.64                           |                           | 261.39             | 0.144        | 0.064        | 3                              | 261.61             | 0.145 | 0.064 | 7.75                           |
| 264.76             | 0.17  | 0.081 | 0.58                           |                           | 261.74             | 0.147        | 0.066        | 2.98                           | 262.04             | 0.149 | 0.067 | 7.87                           |
| 266.31             | 0.18  | 0.087 | 0.63                           |                           | 263.08             | 0.157        | 0.072        | 3.05                           | 263.39             | 0.159 | 0.073 | 7.74                           |
| 271.6              | 0.21  | 0.105 | 0.6                            |                           | 265.01             | 0.171        | 0.081        | 3.06                           | 265.69             | 0.175 | 0.083 | 7.88                           |
| 270.9              | 0.207 | 0.104 | 0.59                           |                           | 268.23             | 0.191        | 0.093        | 2.96                           | 268.99             | 0.195 | 0.095 | 7.82                           |
| 282.28             | 0.259 | 0.138 | 0.56                           |                           | 271.9              | 0.211        | 0.105        | 3.08                           | 273.61             | 0.22  | 0.111 | 7.77                           |
| 288.41             | 0.279 | 0.146 | 0.64                           | <b>13</b>                 | <b>278.53</b>      | <b>0.242</b> | <b>0.124</b> | <b>3.06</b>                    | 279.6              | 0.247 | 0.128 | 7.84                           |
| 316.15             | 0.36  | 0.192 | 0.54                           |                           | 285.89             | 0.271        | 0.143        | 3.12                           | 288.92             | 0.281 | 0.148 | 7.8                            |
| 321.65             | 0.372 | 0.212 | 0.61                           | <b>14</b>                 | <b>296.42</b>      | <b>0.305</b> | <b>0.164</b> | <b>3.08</b>                    | 300.99             | 0.318 | 0.17  | 7.76                           |
| 329.48             | 0.394 | 0.221 | 0.7                            | <b>15</b>                 | <b>315.58</b>      | <b>0.358</b> | <b>0.194</b> | <b>3.09</b>                    | 320.51             | 0.371 | 0.203 | 7.68                           |
| 323.5              | 0.379 | 0.208 | 0.62                           | <b>16</b>                 | <b>341.73</b>      | <b>0.431</b> | <b>0.242</b> | <b>3.08</b>                    | 342.11             | 0.433 | 0.242 | 7.8                            |
| <b>323.5</b>       | 0.379 | 0.208 | 0.62                           |                           | 355.27             | 0.481        | 0.273        | 3.03                           | 358.65             | 0.498 | 0.282 | 7.78                           |
|                    | x     | y     | Luminance                      |                           |                    |              |              |                                |                    |       |       |                                |
| Background         | 0.316 | 0.314 | 3.05                           |                           |                    |              |              |                                |                    |       |       |                                |
| White              | 0.274 | 0.303 | 77.4                           |                           |                    |              |              |                                |                    |       |       |                                |
| Black              |       |       | 0.02                           |                           |                    |              |              |                                |                    |       |       |                                |

The CIELUV subset used to assess color tuning is shown in bold.
